# Supplementary material for: The miR-23–27-24 clusters drive lipid-associated macrophage proliferation in obese adipose tissue
Source: PubMed Central journal article supplement — Cell Rep. Author manuscript; Available in PMC 2023 Dec 11. (PMC10712211; doi:10.1016/j.celrep.2023.112928), 2023-08-04
Supplement: NIHMS1928261-supplement-1.pdf [file NIHMS1928261-supplement-1.pdf]

Cell Reports, Volume 42

## Supplemental information

### **The *miR-23-27-24* clusters drive lipid-associated macrophage proliferation in obese adipose tissue**

**Neil T. Sprenkle, Nathan C. Winn, Kaitlyn E. Bunn, Yang Zhao, Deborah J. Park, Brenna G. Giese, John J. Karijolic, K. Mark Ansel, C. Henrique Serezani, Alyssa H. Hasty, and Heather H. Pua**

**Figure S1**

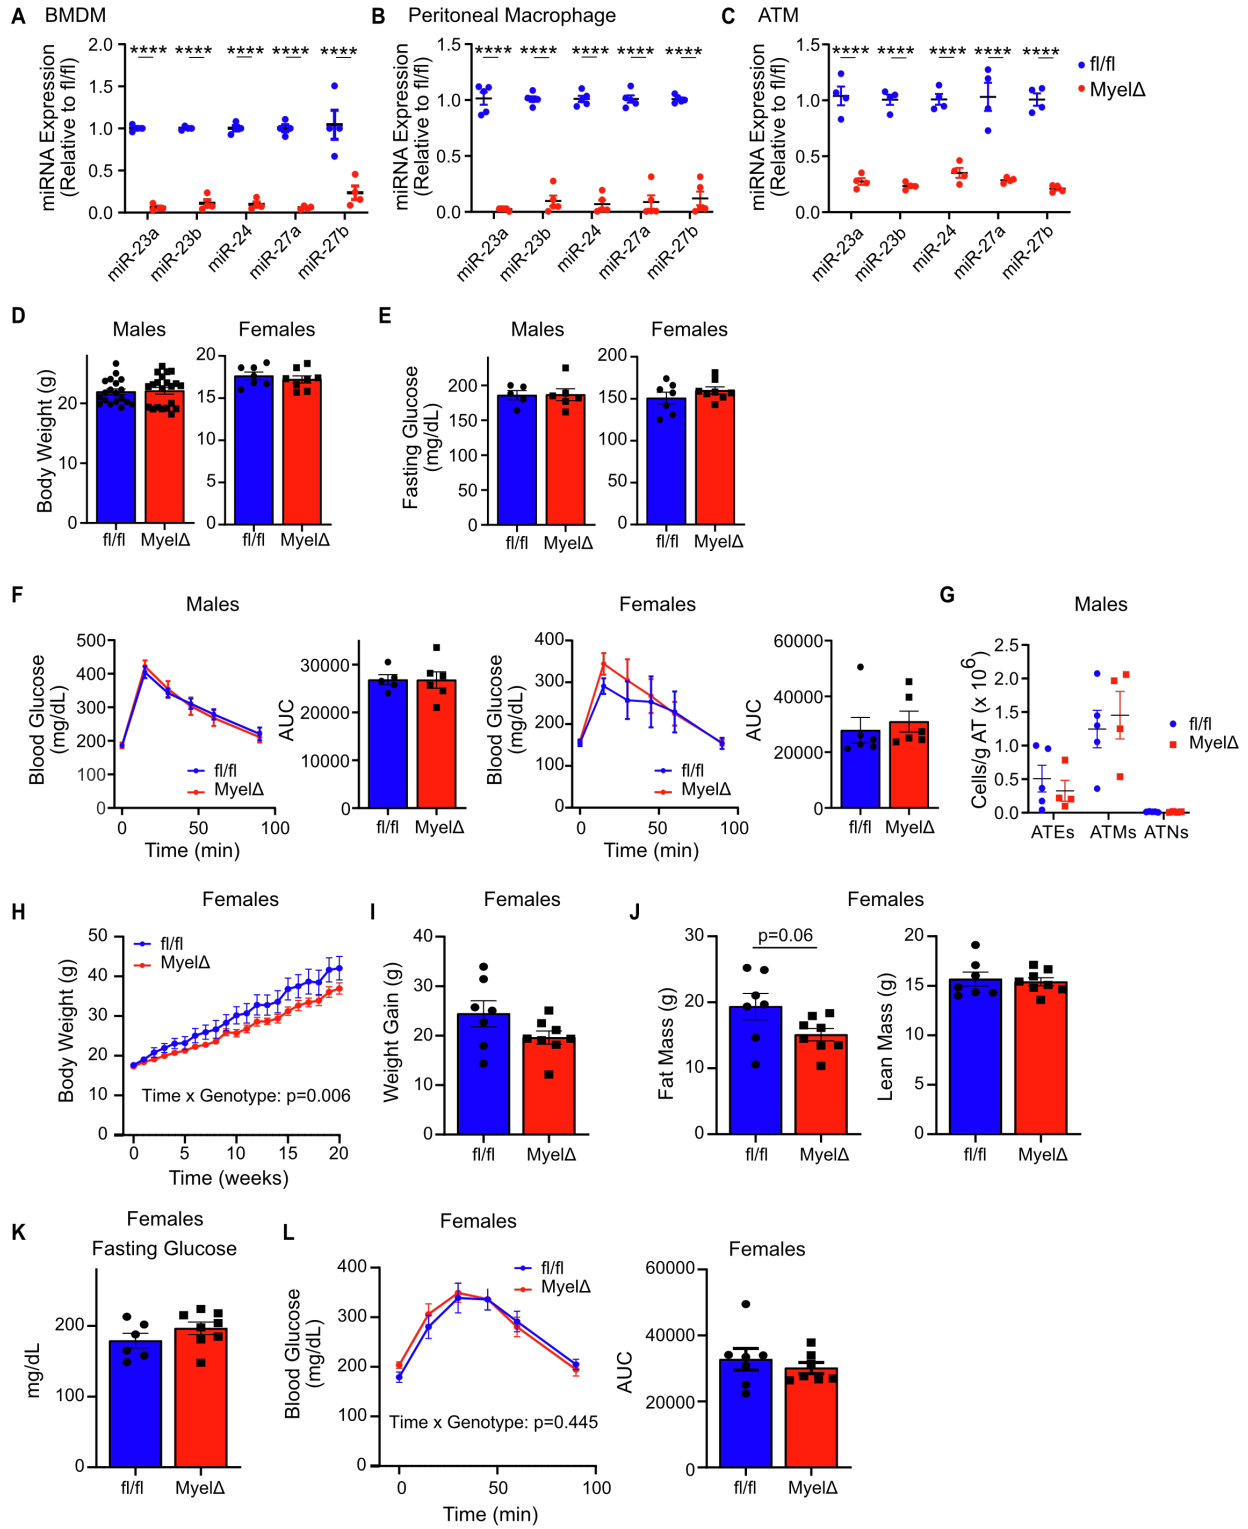

**Figure S1. Myeloid-Specific Deletion of the *miR-23-27-24* Clusters Does Not Alter Systemic Glucose Tolerance in Male and Female Lean Mice and Obese Female Mice, Related to Figure 1.** Relative levels of the indicated miRNAs in (A) bone marrow-derived macrophages, (B) peritoneal macrophages from lean fl/fl or Myel $\Delta$  mice, or (C) F4/80-selected ATMs from obese fl/fl or Myel $\Delta$  mice (two-way ANOVA with Sidák's multiple comparison test). (D) Total bodyweight or (E) fasting glucose levels were recorded in lean male or female fl/fl or Myel $\Delta$  mice (two-tailed t-test). (F) Intraperitoneal glucose tolerance test was performed on lean male or female fl/fl or Myel $\Delta$  mice 1 wk before HFD feeding (two-way ANOVA for curves; two-tailed t-test for AUC). (G) Myeloid cell numbers were quantified in the epididymal WAT of lean fl/fl or Myel $\Delta$  mice (one-way ANOVA with Sidák's multiple comparison test). Female fl/fl or Myel $\Delta$  mice were fed a HFD for 20 weeks followed by measurement of (H) body weight curves (two-way ANOVA with Sidák's multiple comparison test), (I) weight gain (two-tailed t-test), and (J) body composition measurements by NMR (two-tailed t-test). (K) Fasting glucose levels were recorded following HFD feeding (two-tailed t-test). (L) Intraperitoneal glucose tolerance tests (1g/kg lean mass) were performed on female fl/fl and Myel $\Delta$  mice following dietary intervention (two-way ANOVA with Sidák's multiple comparison test for curves; two-tailed t-test for area under curve AUC comparisons). Each dot in bar graphs represents one mouse. (D-G) All lean mice were 7-9 weeks old. (H-L) Female mice were 8-10 weeks old at beginning of dietary intervention. H: 7-8 mice per genotype.  $\pm$  S.E.M. \*\*\*\*p<0.0001.

**Figure S2**

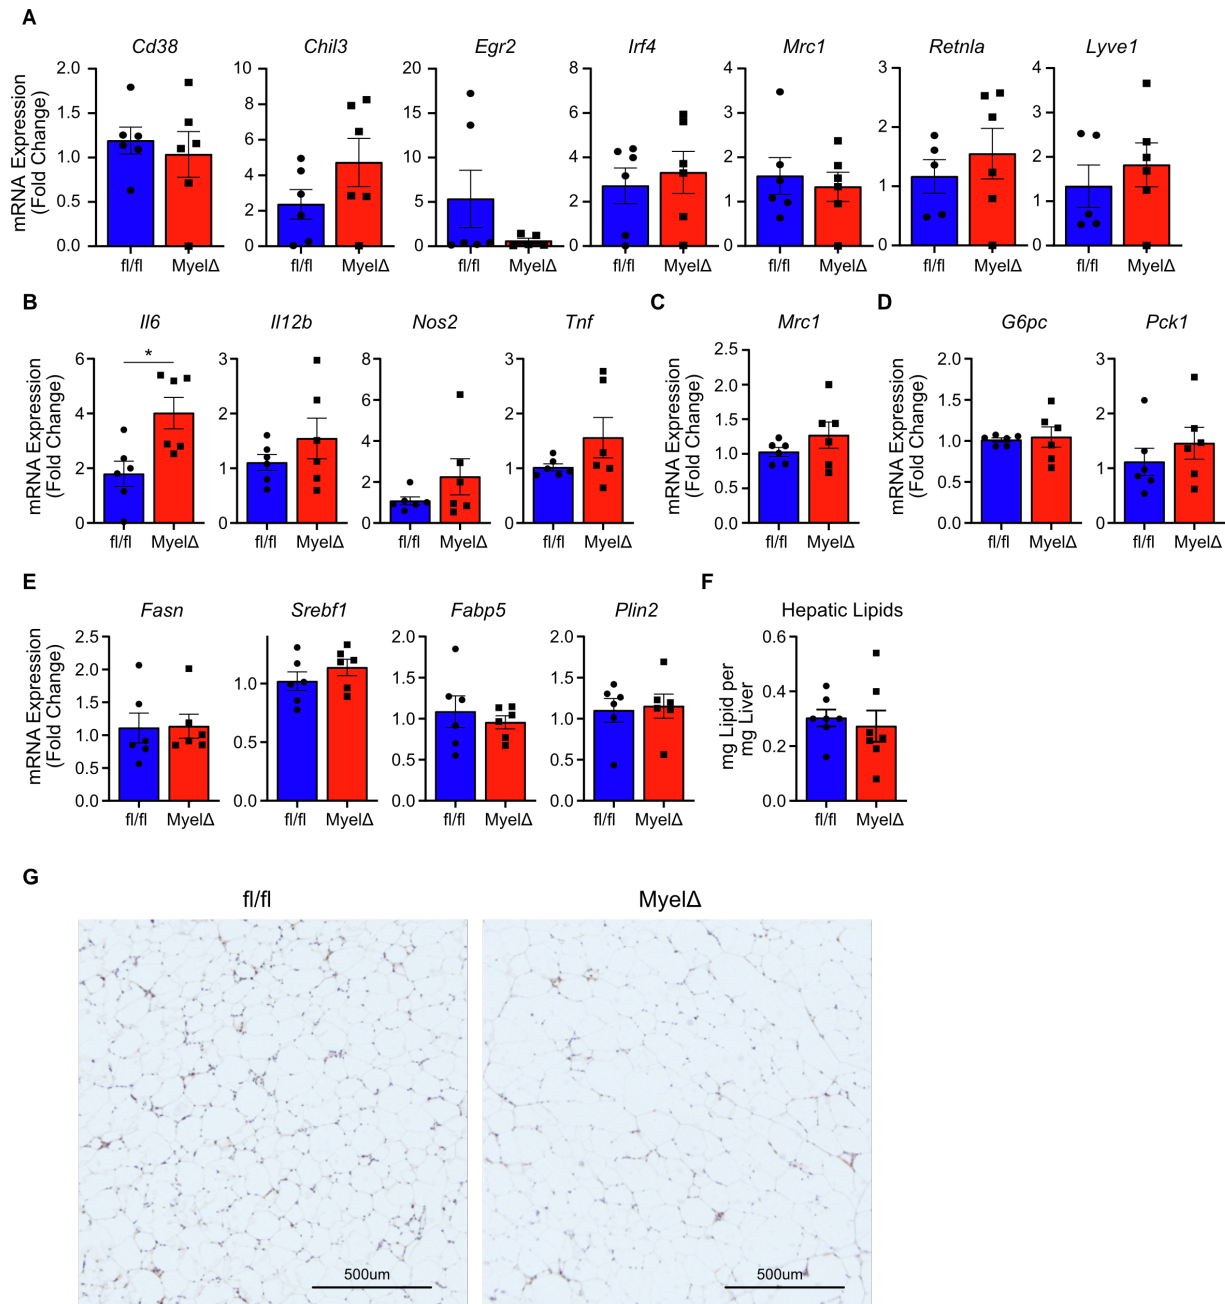

**Figure S2. Deficiency of the *miR-23-27-24* Clusters Does Not Reduce mRNA Levels of M2-like Macrophage-Associated Genes in Obese eWAT or Induce Marked Hepatic Dysfunction, Related to Figure 2. (A)** Levels of M2-like macrophage-associated genes were quantified from eWAT via RT-qPCR (two-tailed t-test). Hepatic mRNA levels of (B) pro-inflammatory factors, (C) *Mrc1*/CD206, (D) gluconeogenic enzymes, or (E) lipid metabolism enzymes were compared between obese *fl/fl* or *MyelΔ* mice (two-tailed t-test). (F) Neutral lipid content was quantified from hepatic tissue from obese *fl/fl* or *MyelΔ* mice (two-tailed t-test). (G) Representative low-magnification image of epididymal WAT (eWAT) sections stained with anti-F4/80 to visualize crown-like structures. Each dot represents one male mouse after HFD feeding.  $\pm$  S.E.M. \*p $\leq$ 0.05.

Figure S3

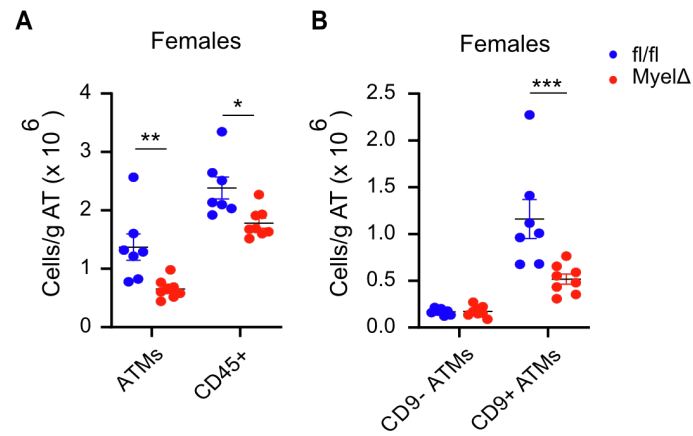

**Figure S3. Myeloid-Specific Deletion of the *miR-23-27-24* Clusters Reduces LAM Accrual in Visceral WAT of Female Mice, Related to Figure 2.** (A) Total ATMs and CD45<sup>+</sup> immune cells and (B) CD9<sup>-</sup> and CD9<sup>+</sup> ATMs were quantified from fl/fl and MyelΔ perigonadal WAT of female mice (two-way ANOVA with Sidák's multiple comparison test). Each dot represents one female mouse after HFD feeding. ± S.E.M. \*p≤0.05, \*\*p<0.01, \*\*\*p<0.001.

**Figure S4**

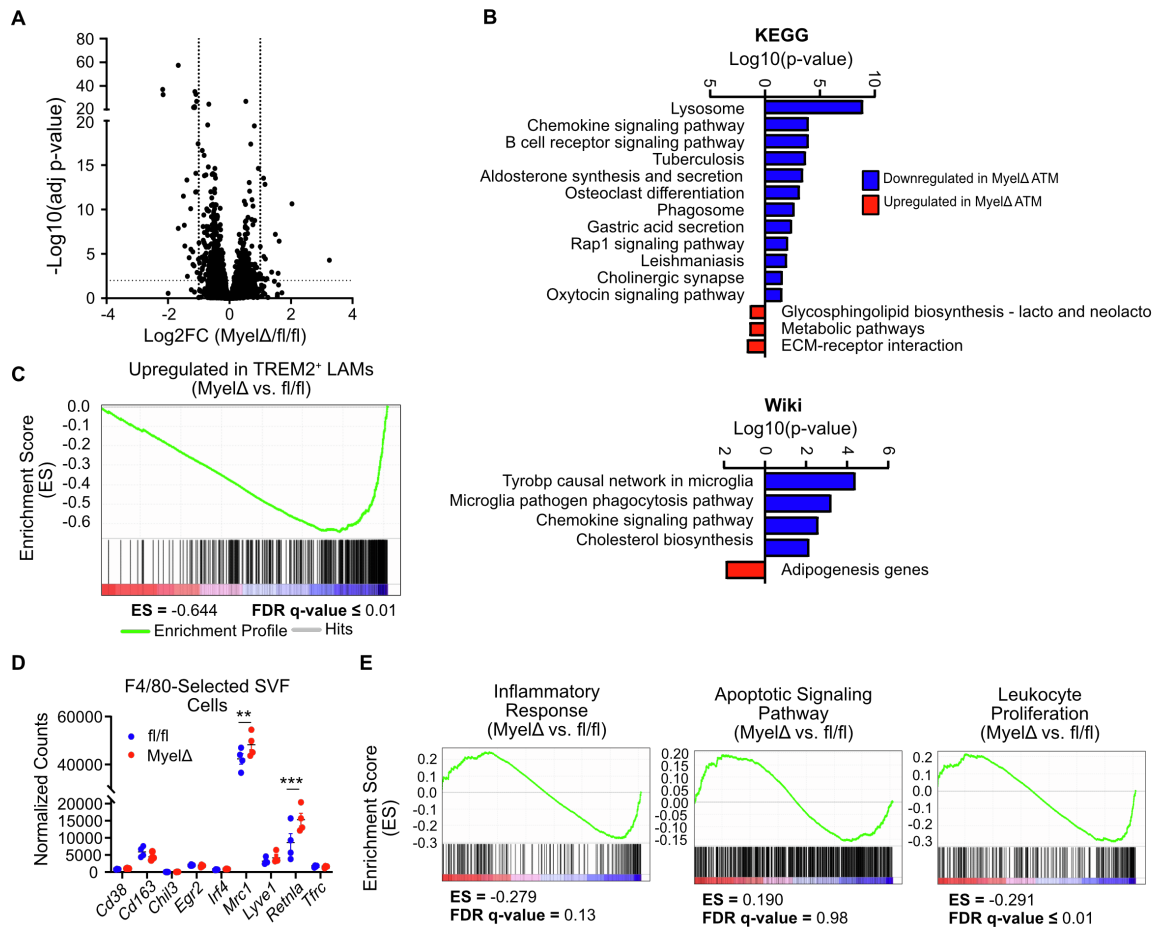

**Figure S4. Myeloid-Specific Deletion of the *miR-23-27-24* Clusters Attenuates Expression of Genes Associated with  $TREM2^+$  LAMs and Proliferation in Obese ATMs, Related to Figure 4.** (A) Volcano plot representing transcriptomic changes between F4/80-selected cells from the stromal vascular fraction of obese fl/fl and Myel $\Delta$  eWAT (basemean > 100). (B) KEGG and Wiki pathway analysis of RNA sequencing (RNA-seq) data. (C) Gene set enrichment analysis (GSEA) of RNA-seq data set for genes upregulated in LAMs compared to lean ATMs. (D) DESeq2 normalized counts of indicated M2-like macrophage genes were quantified (two-way ANOVA with Sidák's multiple comparison test) (E) GSEA of RNA-seq data sets for inflammation, proliferation, and apoptosis. GSEA were plotted with the enrichment curve and rank order location of each gene in the indicated gene set from most upregulated to most downregulated (left to right) in knockout Myel $\Delta$  ATMs compared to fl/fl ATMs. Each dot represents one male mouse after HFD feeding.  $\pm$ S.E.M. \*\* $p < 0.01$ , \*\*\* $p < 0.001$ .

**Figure S5**

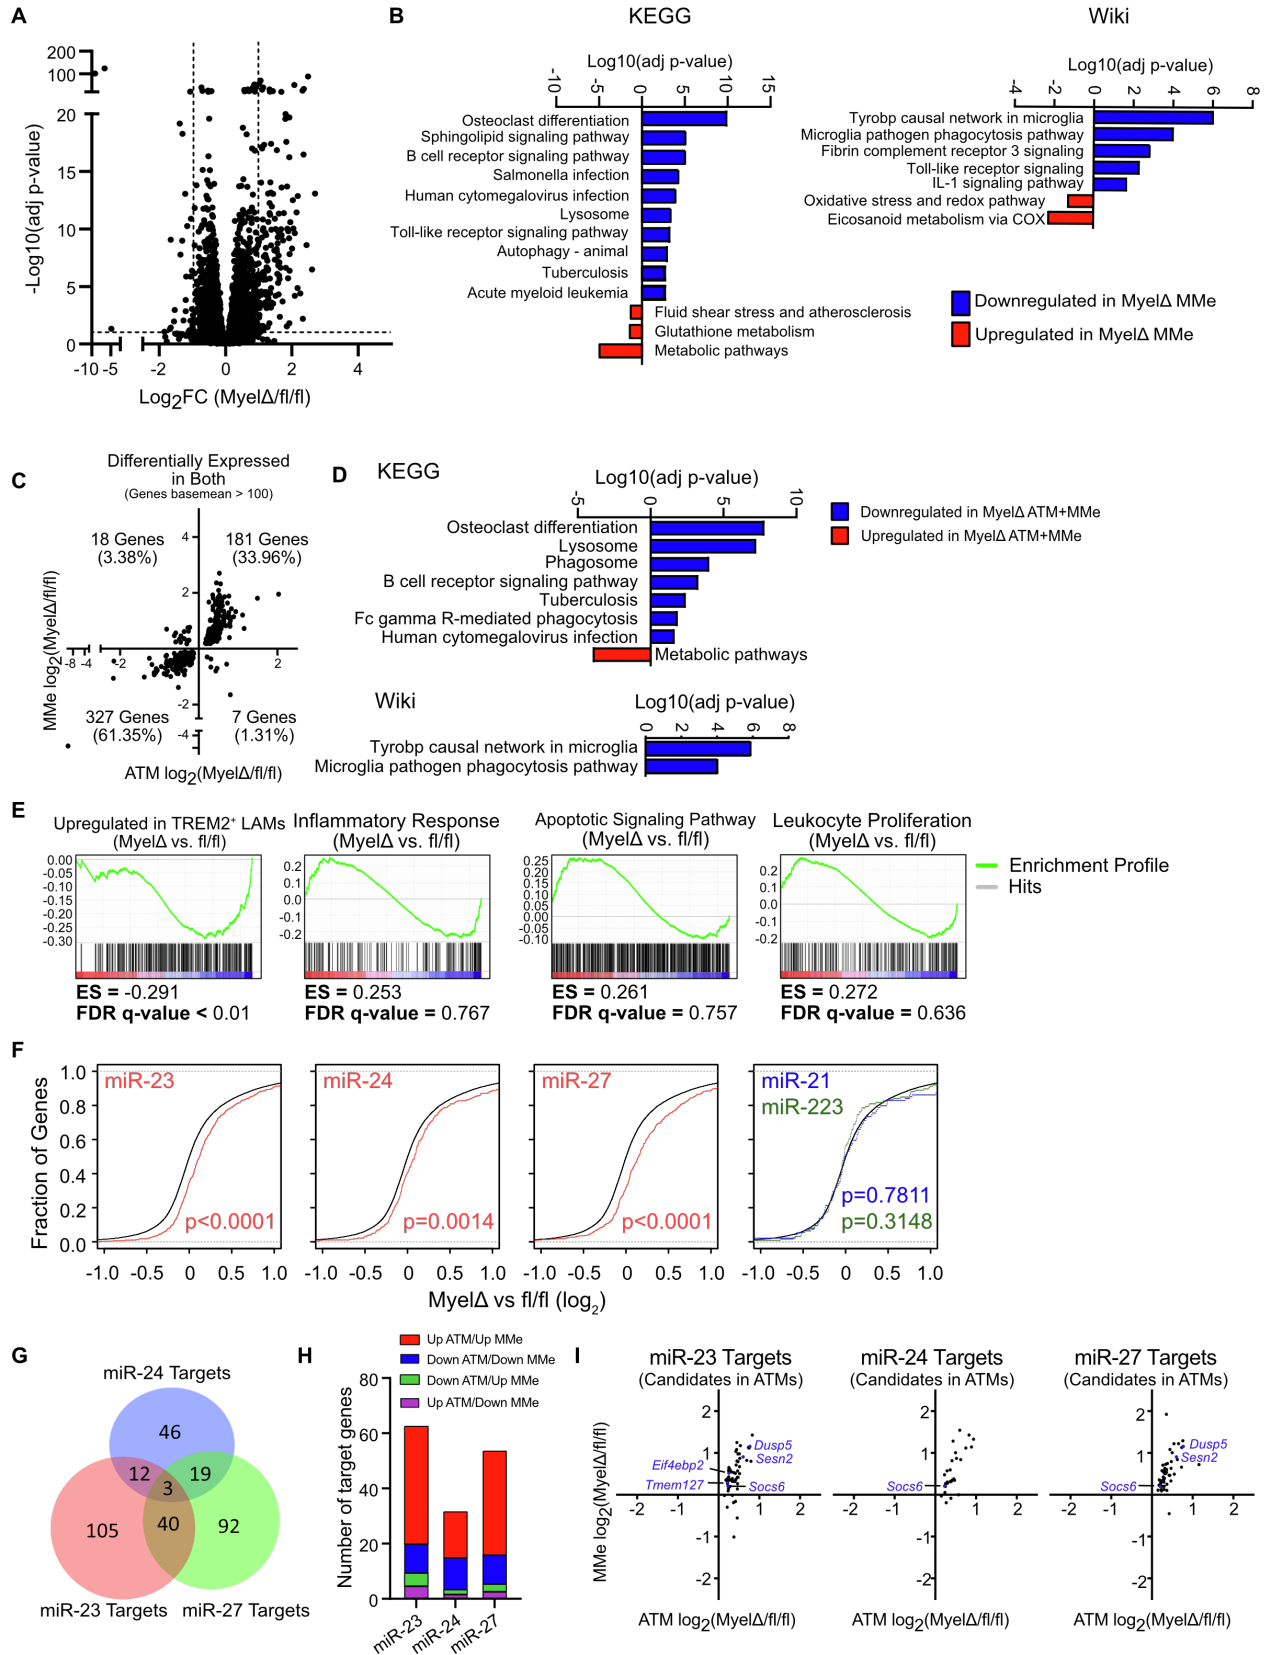

**Figure S5. The *miR-23-27-24* Clusters Transcriptionally Regulate Shared Pathways and Predicted Targets in Metabolically Activated Macrophages and Obese ATMs, Related to Figure 4.** (A) Volcano plot representing transcriptomic changes between fl/fl and Myel $\Delta$  metabolically activated (MMe) BMDMs (basemean > 100). (B) KEGG and Wiki pathway analysis of RNA sequencing (RNA-seq) data. (C)  $\text{Log}_2(\text{Myel}\Delta/\text{fl}/\text{fl})$  of differentially expressed genes in both F4/80-selected ATMs and MMe BMDMs were plotted (basemean>100; adjp value $\leq$ 0.05). (D) KEGG and Wiki pathway analysis of genes significantly upregulated or downregulated in both Myel $\Delta$  ATMs and MMe BMDMs. (E) Gene set enrichment analysis (GSEA) of RNA-seq data from MMe BMDMs for genes upregulated in LAMs compared to lean ATMs or involved in inflammation, apoptosis, or leukocyte proliferation. GSEA were plotted with the enrichment curve and rank order location of each gene in the indicated gene set from most upregulated to most downregulated (left to right) in knockout Myel $\Delta$  MMe BMDMs compared to fl/fl MMe BMDMs. (F) Cumulative distribution frequency plots depicting global mRNA expression by RNA-seq as  $\text{log}_2(\text{Myel}\Delta/\text{fl}/\text{fl})$  in MMe BMDMs plotted against the cumulative fraction of all genes (black), miR-23/24/or/27 8mer targets (red), miR-21 targets (blue), or miR-223 targets (green) (Kolmogorov-Smirnov test). Target predictions were made using TargetScan. (G) Venn diagram depicting number of shared or unique candidate target genes significantly upregulated in MMe BMDMs whose 3'untranslated region (3'UTR) is predicted to be regulated by miR-23, miR-24, and/or miR-27 (basemean>100; adjp value $\leq$ 0.05). (H) Bar graph indicating distribution of shared candidate target genes among differentially expressed in both obese ATMs and MMe BMDMs (basemean>100; adjp value $\leq$ 0.05). (I)  $\text{Log}_2(\text{Myel}\Delta/\text{fl}/\text{fl})$  of MMe BMDM and obese ATM of predicted target genes from the indicated miRNA significantly upregulated in obese ATMs. Blue dots represent candidate target genes predicted to regulate proliferation in ATMs. *Spry1* not depicted as candidate target gene due to basemean<100 in MMe BMDMs.
